# Supplementary material for: Antimicrobial Susceptibility of Persister Biofilm Cells of Bacillus cereus and Pseudomonas fluorescens
Source: MDPI journal article supplement (doi:10.3390/microorganisms10010160), 2022-01-13
Supplement: s1 [file s1]

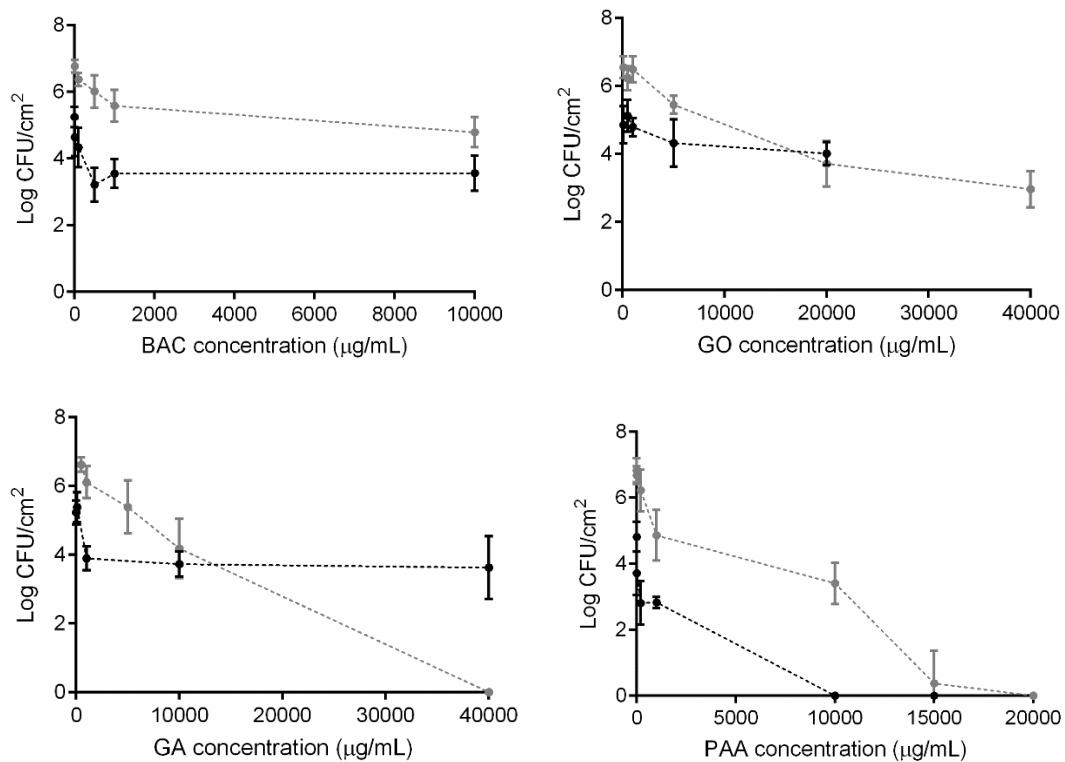

**Figure S1.** Log CFU/cm<sup>2</sup> of 48 h-old *B. cereus* (in black) and *P. fluorescens* biofilms (in grey) treated with selected biocides (BAC, GA, GO and PAA) at different concentrations (in µg/mL) for 30 min. Values are means  $\pm$  SDs of three independent experiments.

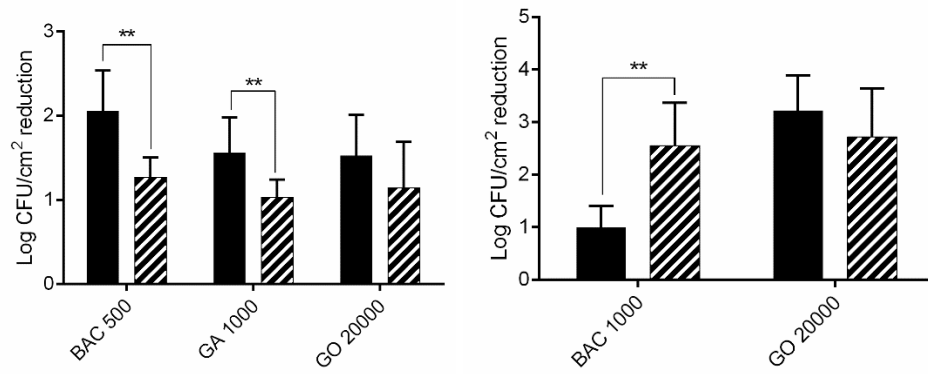

**Figure S2.** Antimicrobial activity of BAC, GA and GO at high concentrations (in µg/mL) for 30 min (full bar) and 4 h (dashed bar), against *B. cereus* (on the left) and *P. fluorescens* (on the right). \* – log CFU/cm<sup>2</sup> reduction was statistical significantly different between time exposures (unpaired *t*-test with Welch's correction,  $P < 0.05$ ).

**Table S1.** Quantification of total culturable and endospores cells of *B. cereus* on persister cells after critical biocide treatment, according to described conditions in Table 1. ND – no detectable CFU/cm<sup>2</sup>.

|                                      | Total ( <b>log</b> CFU/cm <sup>2</sup> ) | Endospores ( <b>log</b> CFU/cm <sup>2</sup> ) |
|--------------------------------------|------------------------------------------|-----------------------------------------------|
| <b>BAC</b>                           | 3.2±0.5                                  | 2.7±0.6                                       |
| <b>GA</b>                            | 3.9±0.3                                  | 3.2±0.7                                       |
| <b>GO</b>                            | 4.0±0.3                                  | 3.3±0.6                                       |
| <b>PAA</b>                           | ND                                       | ND                                            |
| <b>Untreated cells<br/>(control)</b> | 5.3±0.5                                  | 3.5±0.5                                       |

**Table S2.** Formation of persister cells on *P. fluorescens* biofilms – quantification of total cells and viable cells (cells/cm<sup>2</sup>), after GA and PAA treatment. Untreated cells (control samples) corresponded to replacing biocidal solution by sterilized distilled water. Values are mean ± SDs of three independent assays with two replicates.

|                                      | Total cells ( <b>log</b> cells/cm <sup>2</sup> ) | Viable cells ( <b>log</b> CFU/cm <sup>2</sup> ) |
|--------------------------------------|--------------------------------------------------|-------------------------------------------------|
| <b>GA</b>                            | 6.6±0.1                                          | 4.8±0.7                                         |
| <b>PAA</b>                           | 6.7±0.2                                          | 4.7±0.7                                         |
| <b>Untreated cells<br/>(control)</b> | 6.2±0.2                                          | 6.0±0.2                                         |
